Title: EXTRAPOLATED VALUES OF Hb AND HbCO FOR SHUNT CALCULATION

Authors: R.D. Cane, F.F.A. (S.A.), B.A. Shapiro, M.D., and R.A. Harrison, M.D.

Affiliation: Department of Anesthesia, Northwestern University Medical School, 303 E. Chicago Avenue, Chicago, Illinois, 60611

**Introduction.** It has been demonstrated that calculations of blood oxygen content can be significantly affected by errors in measurement of: (1) hemoglobin (Hb),<sup>1</sup> (2) carboxyhemoglobin (HbCO),<sup>1</sup> and (3) oxyhemoglobin (HbO<sub>2</sub>).<sup>2</sup> Since these values are not measured in many hospitals, this study is designed to evaluate the reliability of utilizing assumed values for Hb and HbCO in conjunction with HbO<sub>2</sub> values derived from a nomogram on the intrapulmonary shunt (Qsp) as calculated:

$$\dot{Q}_{sp} = \frac{CcO_2 - CaO_2}{CcO_2 - CvO_2} \cdot \dot{Q}$$

**Methods.** Qsp measurements are routinely performed on all patients with pulmonary artery catheters in our intensive care units. pH, PCO<sub>2</sub> and PO<sub>2</sub> are measured in a quality controlled blood gas laboratory and Hb, HbCO, and HbO<sub>2</sub> are simultaneously measured with an IL 282 co-oximeter. Retrospective analysis of Qsp data from 100 intensive care patients revealed a mean Hb of 11.9 (S.D.  $\pm$  2.3) gm% and a mean HbCO of 1.7 (S.D.  $\pm$  0.7) %. A prospective study is being conducted comparing measured Qsp values with those obtained utilizing an assumed Hb value of 12 gm% and a derived HbO<sub>2</sub> via the Severinghaus nomogram from which an HbCO value of 1.7% is subtracted. Statistical analysis utilizes the student's T-test for paired data.

**Results.** To date, 30 patients have been studied of which 23 were males and 7 were females. Their mean age was 54.5 (S.D.  $\pm$  16) years and 14 were surgical patients. The mean duration of stay in the intensive care unit was 8.7 (S.D.  $\pm$  7.3) days and the mean therapeutic intervention score was 45 (S.D.  $\pm$  15). The mean measured Qsp was 19.3 (S.D.  $\pm$  10.5) % while the mean assumed Qsp was 21.7 (S.D.  $\pm$  10.1) %. The difference between these values is not statistically significant ( $P > 0.01$ ).

**Discussion.** Qsp calculations should ideally be made utilizing measured values for all variables. However, this preliminary data indicates that utilization of an assumed Hb value of 12 gm% and HbCO of 1.7% in conjunction with a derived HbO<sub>2</sub> may provide a clinically acceptable alternative when complete measurements are not available. The study is continuing so as to include a larger heterogenous population of critically ill patients.

#### References.

1. Cohn JD, and Engler PE: Shunt effect of carboxyhemoglobin. Crit Care Med 7:54-58, 1979.
2. Quan SF, Kronberg GM, Lister G, Schlobohm RM, Feeley T, and Don HF: The effect of varying inspired oxygen concentrations on calculated intrapulmonary shunt (Abstr). American Society of Anesthesiologists Annual Meeting, 1978, pp 453-454.
